# Supplementary material
Source: Elsevier journal article supplement (https://www.sciencedirect.com/science/article/pii/S0870255117305401)
Supplement: mmc3 [file S0870255117305401:mmc3.docx]

Supplementary Table 1 Discharge medical therapy according to left atrial enlargement by volume index.

|  | Normal LA | Mild LA enlargement | Moderate LA enlargement | Severe LA enlargement | p |
| --- | --- | --- | --- | --- | --- |
|  | n=116 | n=45 | n=20 | n=19 |  |
| Aspirina | 100.0% | 100.0% | 100.0% | 100.0% |  |
| P2Y12 inhibitor | 100.0% | 97.7% | 100.0% | 100.0% | 0.327 |
| Anticoagulant | 2.7% | 0.0% | 5.0% | 5.6% | 0.516 |
| Statin | 100.0% | 97.7% | 100.0% | 100.0% | 0.327 |
| Beta-blocker | 96.5% | 93.2% | 95.0% | 94.4% | 0.844 |
| ACE inhibitor or ARB | 96.5% | 97.7% | 100.0% | 94.4% | 0.757 |
| ARA | 17.7% | 25.0% | 40.0% | 38.9% | 0.056 |

ACE: angiotensin-converting enzyme; ARA: aldosterone receptor antagonist; ARB: angiotensin receptor blocker; LA: left atrial.

a Since all patients were discharged with aspirin prescription, the chi-square p value was not computed.
